# Supplementary material for: Enhanced Surveillance for Fatal Dengue-Like Acute Febrile Illness in Puerto Rico, 2010-2012
Source: PubMed Central journal article supplement (PMC5058557; doi:10.1371/journal.pntd.0005025), 2016-10-11
Supplement: pntd.0005025.s001.pdf [file pntd.0005025.s001.pdf]

| ICD-10 Code                                                                        | ICD-10 Code Title                                                                                                          | ICD-9 Code | ICD-9 Code Title                                          |
|------------------------------------------------------------------------------------|----------------------------------------------------------------------------------------------------------------------------|------------|-----------------------------------------------------------|
| <b>Clinical Sepsis, Viral Syndromes, Dengue Fever and Dengue Hemorrhagic Fever</b> |                                                                                                                            |            |                                                           |
| A41.9                                                                              | Sepsis, unspecified                                                                                                        | 038.9      | Unspecified septicemia                                    |
| A41.9                                                                              | Sepsis                                                                                                                     | 995.91     | Sepsis                                                    |
| A90                                                                                | Dengue fever                                                                                                               | 061        | Dengue                                                    |
| A91                                                                                | Dengue hemorrhagic fever                                                                                                   | 065.4      | Mosquito-borne hemorrhagic fever                          |
| A92.9                                                                              | Mosquito-borne viral fever, unspecified                                                                                    | 066.9      | Arthropod-borne viral disease, unspecified                |
| A99                                                                                | Unspecified viral hemorrhagic fever                                                                                        | 065.9      | Arthropod-borne hemorrhagic fever, unspecified            |
| B34.9                                                                              | Viral infection, unspecified. Includes: Viremia, not otherwise specified (NOS)                                             | 790.8      | Unspecified viremia                                       |
| R65.20                                                                             | Severe sepsis                                                                                                              | 995.92     | Severe sepsis                                             |
| <b>Shock or Dehydration</b>                                                        |                                                                                                                            |            |                                                           |
| R57.1                                                                              | Hypovolemic shock                                                                                                          | 785.59     | Other shock, without trauma                               |
| R57.8                                                                              | Other shock                                                                                                                | 785.59     | Other shock, without trauma                               |
| R57.9                                                                              | Shock unspecified                                                                                                          | 785.50     | Shock, unspecified                                        |
| R65.21                                                                             | Severe sepsis with septic shock                                                                                            | 785.52     | Severe sepsis with septic shock                           |
| E86                                                                                | Dehydration                                                                                                                | 276.51     | Dehydration                                               |
| <b>Acidosis</b>                                                                    |                                                                                                                            |            |                                                           |
| E87.2                                                                              | Acidosis NOS, Lactic acidosis, metabolic, or respiratory acidosis. Excludes: Diabetic acidosis (E10-E13 with ketoacidosis) | 276.2      | Acidosis                                                  |
| E87.8                                                                              | Other disorders of electrolyte and fluid balance, not elsewhere classified                                                 | 276.9      | Electrolyte and fluid disorders, not elsewhere classified |
| <b>Hemorrhage</b>                                                                  |                                                                                                                            |            |                                                           |
| A27.9                                                                              | Leptospirosis icterohemorrhagica                                                                                           | 100.9      | Leptospirosis                                             |
| K92.2                                                                              | Gastrointestinal hemorrhage, unspecified                                                                                   | 578.9      | Hemorrhage of gastrointestinal tract, unspecified         |
| R58.8                                                                              | Hemorrhage, not classified elsewhere                                                                                       | 459.0      | Hemorrhage, unspecified                                   |
| <b>Thrombocytopenia</b>                                                            |                                                                                                                            |            |                                                           |
| D69.42                                                                             | Congenital and hereditary thrombocytopenia purpura                                                                         | 287.33     | Congenital and hereditary thrombocytopenia purpura        |
| D69.49                                                                             | Other primary thrombocytopenia                                                                                             | 287.39     | Primary thrombocytopenia, other                           |
| D69.5                                                                              | Secondary thrombocytopenia                                                                                                 | 287.4      | Secondary thrombocytopenia                                |
| D69.6                                                                              | Thrombocytopenia, unspecified                                                                                              | 287.5      | Thrombocytopenia, unspecified                             |
| P61.0                                                                              | Transient neonatal thrombocytopenia                                                                                        | 776.1      | Transient neonatal thrombocytopenia                       |

| ICD-10 Code                                                       | ICD-10 Code Title                                                                  | ICD-9 Code      | ICD-9 Code Title                                                                   |
|-------------------------------------------------------------------|------------------------------------------------------------------------------------|-----------------|------------------------------------------------------------------------------------|
| <b>Encephalitis, Reye's Syndrome, and Guillain-Barré Syndrome</b> |                                                                                    |                 |                                                                                    |
| A83.8                                                             | Other mosquito-borne viral encephalitis                                            | 062.8           | Other specified mosquito-borne viral encephalitis                                  |
| A83.9                                                             | Mosquito-borne viral encephalitis, unspecified                                     | 062.9           | Mosquito-borne viral encephalitis, unspecified arthropod                           |
| A85.2                                                             | Arthropod-borne viral encephalitis, unspecified                                    | 064             | Viral encephalitis transmitted by other and unspecified                            |
| A85.8                                                             | Other specified viral encephalitis                                                 | 049.8           | Other specified non-arthropod-borne viral disease of central nervous system (CNS)  |
| A86.6                                                             | Unspecified viral encephalitis                                                     | 049.9           | Unspecified non-arthropod-borne viral disease of CNS                               |
| A89.9                                                             | Unspecified viral infection of CNS                                                 | 049.9           | Unspecified non-arthropod-borne viral disease of CNS                               |
| G61.0                                                             | Guillain-Barré syndrome                                                            | 357.0           | Acute infective polyneuritis                                                       |
| G93.7                                                             | Reye's syndrome                                                                    | 331.81          | Reye's syndrome                                                                    |
| <b>Pleural Effusion</b>                                           |                                                                                    |                 |                                                                                    |
| J90.0                                                             | Pleural effusion, not elsewhere classified                                         | 511.89<br>511.9 | Hemothorax<br>Unspecified pleural effusion                                         |
| <b>Ascites</b>                                                    |                                                                                    |                 |                                                                                    |
| R18.8                                                             | Other ascites                                                                      | 789.59          | Ascites, other                                                                     |
| <b>Sudden Unexplained Deaths</b>                                  |                                                                                    |                 |                                                                                    |
| R95                                                               | Sudden infant death syndrome                                                       | 798.0           | Sudden infant death syndrome                                                       |
| R96                                                               | Other sudden death, cause unknown                                                  | -----           | No translation                                                                     |
| R96.0                                                             | Instantaneous death                                                                | 798.1           | Instantaneous death                                                                |
| R96.1                                                             | Death occurring less than 24 hours from onset of symptoms, not otherwise explained | 798.2           | Death occurring less than 24 hours from onset of symptoms, not otherwise explained |
| R98                                                               | Unattended death                                                                   | 798.9           | Unattended death                                                                   |
| R99                                                               | Other ill-defined and unspecified causes of mortality                              | 799.9           | Other ill-defined and unspecified causes of mortality                              |
