# Supplementary material for: Enhanced Surveillance for Fatal Dengue-Like Acute Febrile Illness in Puerto Rico, 2010-2012
Source: PubMed Central journal article supplement (PMC5058557; doi:10.1371/journal.pntd.0005025), 2016-10-11
Supplement: pntd.0005025.s002.pdf [file pntd.0005025.s002.pdf]

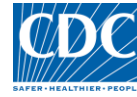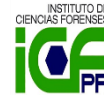

# Fatal Case Surveillance for Deaths due to Dengue-like-illness

## Surgical Pathology and Autopsy Report (SPAR)

### Demographic Information

Full Name: \_\_\_\_\_ Sex:  male  female  
Paternal Last Maternal Last First M.I.

Address: \_\_\_\_\_  
Urbanization Barrio or Sector Street Address Apartment/Unit #

Weight Municipality  lbs Height  inches Blood type (circle):  A+  B+  AB+  O+  A-  B-  AB-  O- State ZIP Code

Date of Death: \_\_\_\_\_ Time of Death: \_\_\_\_\_ a.m. \_\_\_\_\_ p.m. Place of death (Specify Hospital): \_\_\_\_\_  
mm dd yyyy

Place of birth: \_\_\_\_\_ Number of years living in PR: \_\_\_\_\_ years

### Autopsy Results

|                                   |                              |                             |                         |                    |
|-----------------------------------|------------------------------|-----------------------------|-------------------------|--------------------|
| Ascites?                          | YES <input type="checkbox"/> | NO <input type="checkbox"/> | If yes, how much? _____ | cc Describe: _____ |
| Right pleural effusion?           | YES <input type="checkbox"/> | NO <input type="checkbox"/> | If yes, how much? _____ | cc Describe: _____ |
| Left pleural effusion?            | YES <input type="checkbox"/> | NO <input type="checkbox"/> | If yes, how much? _____ | cc Describe: _____ |
| Pericardial effusion?             | YES <input type="checkbox"/> | NO <input type="checkbox"/> | If yes, how much? _____ | cc Describe: _____ |
| Other effusion?                   | YES <input type="checkbox"/> | NO <input type="checkbox"/> | If yes, how much? _____ | cc Describe: _____ |
| <i>Describe location:</i> _____   |                              |                             |                         |                    |
| Pulmonary hemorrhage?             | YES <input type="checkbox"/> | NO <input type="checkbox"/> | If yes, how much? _____ | cc Describe: _____ |
| <i>Describe location:</i> _____   |                              |                             |                         |                    |
| Intestinal hemorrhage?            | YES <input type="checkbox"/> | NO <input type="checkbox"/> | If yes, how much? _____ | cc Describe: _____ |
| <i>Describe location:</i> _____   |                              |                             |                         |                    |
| Other hemorrhage?                 | YES <input type="checkbox"/> | NO <input type="checkbox"/> | If yes, how much? _____ | cc Describe: _____ |
| <i>Describe location:</i> _____   |                              |                             |                         |                    |
| Intracranial bleed?               | YES <input type="checkbox"/> | NO <input type="checkbox"/> | If yes, how much? _____ | cc Describe: _____ |
| <i>Describe location:</i> _____   |                              |                             |                         |                    |
| Other significant gross findings? | YES <input type="checkbox"/> | NO <input type="checkbox"/> | If yes, how much? _____ | cc Describe: _____ |
| <i>Describe location:</i> _____   |                              |                             |                         |                    |

### Skin Findings

|            |                              |                             |                         |                 |
|------------|------------------------------|-----------------------------|-------------------------|-----------------|
| Petechiae? | YES <input type="checkbox"/> | NO <input type="checkbox"/> | If yes, how many? _____ | Location: _____ |
| Purpura?   | YES <input type="checkbox"/> | NO <input type="checkbox"/> | If yes, how many? _____ | Location: _____ |

|                      |                                 |                                |                                   |                 |
|----------------------|---------------------------------|--------------------------------|-----------------------------------|-----------------|
| Ecchymosis?          | YES<br><input type="checkbox"/> | NO<br><input type="checkbox"/> | If yes, how many? _____           | Location: _____ |
| Edema?               | YES<br><input type="checkbox"/> | NO<br><input type="checkbox"/> | If yes, where? _____              |                 |
| Skin rash?           | YES<br><input type="checkbox"/> | NO<br><input type="checkbox"/> | If yes, where and describe? _____ |                 |
| Jaundice, icteric?   | YES<br><input type="checkbox"/> | NO<br><input type="checkbox"/> | Describe: _____                   |                 |
| Other skin findings? | YES<br><input type="checkbox"/> | NO<br><input type="checkbox"/> | Describe: _____                   |                 |

Describe location: \_\_\_\_\_

### Check List for Tissue Collection

| Tissue              | Collect tissues 1-7 on list below for ALL CASES. Collect multiple 1x2 cm tissue pieces except for 6 and 7. Collect 8-15 as needed. | Check list                                                     |
|---------------------|------------------------------------------------------------------------------------------------------------------------------------|----------------------------------------------------------------|
| 1. Liver            | Peritoneal, towards hilum, central <b>(3 pieces from liver)</b>                                                                    | Done: YES <input type="checkbox"/> NO <input type="checkbox"/> |
| 2. Lung             | Base, left peripheral, right peripheral, hilum, tracheobronchial <b>(5 pieces from lung)</b>                                       | Done: YES <input type="checkbox"/> NO <input type="checkbox"/> |
| 3. Kidney           | Left (apex), right (apex) <b>(2 pieces from kidney)</b>                                                                            | Done: YES <input type="checkbox"/> NO <input type="checkbox"/> |
| 4. Spleen           | Apex, middle, base <b>(3 pieces from spleen)</b>                                                                                   | Done: YES <input type="checkbox"/> NO <input type="checkbox"/> |
| 5. Lymph node       | Specify: mesenteric, mediastinal <b>(2 from lymph node)</b>                                                                        | Done: YES <input type="checkbox"/> NO <input type="checkbox"/> |
| 6. Bone marrow      | Marrow from ribs, place sample in formalin                                                                                         | Done: YES <input type="checkbox"/> NO <input type="checkbox"/> |
| 7. Skin with rash   | Skin from rash effected area (1 piece 3-5 mm or 4mm punch biopsy)                                                                  | Done: YES <input type="checkbox"/> NO <input type="checkbox"/> |
| 8. Thymus           | Central medulla, a peripheral cortex <b>(2 pieces from thymus)</b>                                                                 | Done: YES <input type="checkbox"/> NO <input type="checkbox"/> |
| 9. Adrenals         | Left, right <b>(2 from adrenals)</b>                                                                                               | Done: YES <input type="checkbox"/> NO <input type="checkbox"/> |
| 10. Cerebellum      | Collect tissue if mental status changes                                                                                            | Done: YES <input type="checkbox"/> NO <input type="checkbox"/> |
| 11. Cerebrum        | Collect tissue if mental status changes                                                                                            | Done: YES <input type="checkbox"/> NO <input type="checkbox"/> |
| 12. Brain stem      | Collect tissue if mental status changes                                                                                            | Done: YES <input type="checkbox"/> NO <input type="checkbox"/> |
| 13. Intestine       | Collect if GI bleeding<br>Small, Large <b>(2 pieces from intestine)</b>                                                            | Done: YES <input type="checkbox"/> NO <input type="checkbox"/> |
| 14. Heart           | Collect if cardiac effusion<br>Left ventricle, right ventricle <b>(2 pieces from heart)</b>                                        | Done: YES <input type="checkbox"/> NO <input type="checkbox"/> |
| 15. Urinary Bladder | Collect if urinary bleeding<br>Wall <b>(1 piece from urinary bladder)</b>                                                          | Done: YES <input type="checkbox"/> NO <input type="checkbox"/> |

### Body Fluid Collection

| Body Fluid               | Specifications on body fluid sampling technique | Check list                                                     |
|--------------------------|-------------------------------------------------|----------------------------------------------------------------|
| Whole blood from heart   | Two, 10 ml EDTA tubes                           | Done: YES <input type="checkbox"/> NO <input type="checkbox"/> |
| Cerebral spinal fluid    | Red top tube, marked CSF                        | Done: YES <input type="checkbox"/> NO <input type="checkbox"/> |
| Effusion fluid from lung | Red top tube, marked pleural effusion           | Done: YES <input type="checkbox"/> NO <input type="checkbox"/> |

### Signature and mailing address of submitter

Signature: \_\_\_\_\_ Date: \_\_\_\_\_

Address: \_\_\_\_\_ Telephone: \_\_\_\_\_
